# Supplementary material
Source: MDPI journal article supplement (https://www.mdpi.com/2304-6740/6/3/78)
Supplement: s1 [file s1]

# Supplementary Materials: Metal-Catalyzed Degradation of Cellulose in Ionic Liquid Media

Tiina Aid \*, Mihkel Koel, Margus Lopp and Merike Vaher

**Table S1.** Glucose, mannose and HMF contents in cellulose samples degraded in [BMIM]Cl using ZnCl<sub>2</sub>, MgCl<sub>2</sub>, CrCl<sub>3</sub>, tungsten (W-POM) and molybdenum (Mo-POM) oxide-based POMs as catalysts. Catalyst loading was 10 wt % from cellulose and cellulose loading was 10 wt %.

| Catalyst          | Glucose, % | Mannose, % | HMF, %     | Total products yield, % |
|-------------------|------------|------------|------------|-------------------------|
| No catalyst       | >0.04      | >0.04      | >0.04      | >0.04                   |
| ZnCl <sub>2</sub> | >0.04      | >0.04      | 4.64 ± 0.3 | 4.64                    |
| MgCl <sub>2</sub> | >0.04      | >0.04      | 3.78 ± 0.3 | 3.78                    |
| CrCl <sub>3</sub> | >0.04      | >0.04      | 55.3 ± 0.6 | 55.3                    |
| W-POM             | 33.7 ± 0.1 | >0.04      | 5.82 ± 0.2 | 39.5                    |
| Mo-POM            | 4.96 ± 0.3 | 2.26 ± 0.1 | 2.95 ± 0.1 | 10.2                    |

**Table S2.** Conversion of cellulose to glucose, mannose and HMF in [BMIM]Cl at 100 and 120 °C by using POMs based on molybdenum oxide. Catalyst loading was 10 wt % from cellulose and cellulose loading was 10 wt % from solvent.

| Time, h | Glucose at 100°C | HMF at 100°C | Mannose at 100°C | HMF at 120°C |
|---------|------------------|--------------|------------------|--------------|
| 0       | >0.04            | >0.04        | >0.04            | >0.04        |
| 8       | 0.75 ± 0.2       | 1.21 ± 0.3   | 0.31 ± 0.1       | 1.39 ± 0.3   |
| 24      | 4.96 ± 0.3       | 2.95 ± 0.1   | 2.26 ± 0.3       | 3.43 ± 0.4   |
| 48      | 9.18 ± 0.3       | 5.11 ± 0.3   | 3.78 ± 0.2       | 0.97 ± 0.2   |
| 72      | 13.9 ± 0.1       | 7.15 ± 0.2   | 5.47 ± 0.3       | 0.46 ± 0.1   |

**Table S3.** Conversion of cellulose to glucose, mannose and HMF in [BMIM]Cl at 100 and 120 °C by using POMs based on tungsten oxide. Catalyst loading was 10 wt % from cellulose and cellulose loading was 10 wt % from solvent.

| Time, h | Glucose at 100°C | HMF at 100°C | HMF at 120°C |
|---------|------------------|--------------|--------------|
| 0       | >0.04            | >0.04        | >0.04        |
| 8       | 12.8 ± 0.7       | 1.50 ± 0.3   | 2.16 ± 0.2   |
| 24      | 33.7 ± 0.9       | 5.81 ± 0.4   | 1.36 ± 0.2   |
| 48      | 36.0 ± 0.5       | 9.54 ± 0.4   | 0.07 ± 0.0   |
| 72      | 36.7 ± 0.3       | 11.6 ± 0.7   | 0.01 ± 0.0   |

**Table S4.** Efficiency of cellulose degradation in [BMIM]Cl at 100°C by using phosphotungstic acid hydrate added 20 min before the substrate. Catalyst loading was 10 wt % from cellulose and cellulose loading was 10 wt % from solvent.

| Time, h | Glucose, % | HMF, %     |
|---------|------------|------------|
| 0       | >0.04      | >0.04      |
| 3       | 2.53 ± 0.3 | 0.30 ± 0.1 |
| 8       | 12.8 ± 0.4 | 1.50 ± 0.2 |
| 24      | 33.7 ± 0.7 | 5.81 ± 0.3 |
| 48      | 36.0 ± 0.5 | 9.54 ± 0.3 |
| 72      | 36.7 ± 0.4 | 11.6 ± 0.5 |

**Table S5.** Conversion of cellulose to HMF in [BMIM]Cl at 120°C by using tungsten and molybdenum oxides-based POMs at 5 and 10% substrate loading. Catalyst loading was 10 wt % from cellulose and cellulose loading was 5 or 10 wt % from solvent.

| Time, h | W-pom*, % | W-POM**, % | Mo-pom*, % | Mo-pom**, % |
|---------|-----------|------------|------------|-------------|
| 0       | >0.04     | >0.04      | >0.04      | >0.04       |
| 8       | 4.33      | 4.65       | 2.79       | 2.93        |
| 24      | 2.72      | 3.07       | 6.86       | 6.59        |
| 48      | 0.20      | 0.43       | 1.93       | 3.25        |
| 72      | 0.01      | 0.16       | 0.92       | 1.12        |

\* substrate loading 5 wt %; \*\* substrate loading 10 wt %.

**Table S6.** Efficiency of cellulose degradation in [BMIM]Cl at 100°C by using phosphotungstic acid hydrate added 3 h after the substrate. Catalyst loading was 10 wt % from cellulose and cellulose loading was 10 wt % from solvent.

| Time, h | Glucose, % | HMF, %     | Cellobiose, % |
|---------|------------|------------|---------------|
| 1       | >0.04      | >0.04      | >0.04         |
| 19      | 3.51 ± 0.2 | 0.44 ± 0.1 | 1.33 ± 0.1    |
| 24      | 6.87 ± 0.1 | 0.95 ± 0.2 | 2.10 ± 0.2    |
| 48      | 9.65 ± 0.5 | 3.20 ± 0.2 | >0.04         |
| 72      | >0.04      | 3.67 ± 0.3 | >0.04         |

**Table S7.** Conversion of cellulose to glucose, mannose and HMF in [BMIM]Cl at 100 °C in the presence of water (10 wt % of solvent) by using POMs based on tungsten oxide. Catalyst loading was 10 wt % from cellulose and cellulose loading was 10 wt % from solvent.

| Time, h | Glucose*, % | HMF*, %    | Glucose, % | HMF, %     |
|---------|-------------|------------|------------|------------|
| 0       | >0.04       | >0.04      | >0.04      | >0.04      |
| 9       | >0.04       | 0.15 ± 0.1 | 12.8 ± 0.4 | 1.50 ± 0.1 |
| 24      | 8.68 ± 0.4  | 1.36 ± 0.2 | 33.7 ± 0.6 | 5.81 ± 0.2 |
| 48      | 1.28 ± 0.2  | 3.23 ± 0.4 | 36.0 ± 0.5 | 9.54 ± 0.5 |
| 72      | 0.93 ± 0.1  | 3.78 ± 0.2 | 36.7 ± 0.4 | 11.6 ± 0.3 |

\* Reaction mixture contained 10 wt % water.

**Table S8.** Conversion of cellulose to glucose, mannose and HMF in [BMIM]Cl at 100 °C in the presence of water (10 wt % of solvent) by using POMs based on (a) tungsten oxide, (b) molybdenum oxide. Catalyst loading was 10 wt % from cellulose and cellulose loading was 10 wt % from solvent.

| Time, h | Glucose*, % | Mannose*, % | HMF*, %    | Glucose, % | HMF, %     | Mannose, % |
|---------|-------------|-------------|------------|------------|------------|------------|
| 0       | >0.04       | >0.04       | >0.04      | >0.04      | >0.04      | >0.04      |
| 8       | >0.04       | >0.04       | 3.41 ± 0.1 | 0.75 ± 0.1 | 1.21 ± 0.1 | 0.30 ± 0.0 |
| 24      | >0.04       | >0.04       | 8.46 ± 0.3 | 4.96 ± 0.2 | 2.95 ± 0.3 | 2.26 ± 0.1 |
| 48      | 22.8 ± 0.2  | 7.91 ± 0.2  | 15.5 ± 0.2 | 9.18 ± 0.2 | 5.11 ± 0.2 | 3.78 ± 0.2 |
| 72      | 3.77 ± 0.1  | 14.8 ± 0.3  | 22.4 ± 0.2 | 13.9 ± 0.4 | 7.15 ± 0.2 | 5.47 ± 0.3 |

\* Reaction mixture contained 10 wt % water.
